# Supplementary material
Source: HighWire-hosted journal article supplement (https://bmjopen.bmj.com/content/15/2/e090454)
Supplement: inline-supplementary-material-3 [file inline-supplementary-material-3.pdf]

Appendix 3:

Table 3. Trial Registration Data Set of the ProCare study (MI for Caregiver Counselling)

| Data category                                    | Information    |
|--------------------------------------------------|----------------|
| Primary registry and trial identification number | ISRCTN14218056 |

MI: Motivational Interviewing

|                                           |                                                                                                                                                                                                                                                                                                                                                                                                                                                                                                                                                                                                                                             |
|-------------------------------------------|---------------------------------------------------------------------------------------------------------------------------------------------------------------------------------------------------------------------------------------------------------------------------------------------------------------------------------------------------------------------------------------------------------------------------------------------------------------------------------------------------------------------------------------------------------------------------------------------------------------------------------------------|
| Date of registration in primary registry  | 30/04/2024                                                                                                                                                                                                                                                                                                                                                                                                                                                                                                                                                                                                                                  |
| Secondary identifying numbers             | -                                                                                                                                                                                                                                                                                                                                                                                                                                                                                                                                                                                                                                           |
| Source(s) of monetary or material support | Reinhard Frank Stiftung                                                                                                                                                                                                                                                                                                                                                                                                                                                                                                                                                                                                                     |
| Primary sponsor                           | Reinhard Frank Stiftung                                                                                                                                                                                                                                                                                                                                                                                                                                                                                                                                                                                                                     |
| Secondary sponsor(s)                      | -                                                                                                                                                                                                                                                                                                                                                                                                                                                                                                                                                                                                                                           |
| Contact for public queries                | PD Dr. Anna Pendergrass ( <a href="mailto:anna.pendergrass@uk-erlangen.de">anna.pendergrass@uk-erlangen.de</a> );<br>Johanna Schmidt ( <a href="mailto:Schmidt.johanna@uk-erlangen.de">Schmidt.johanna@uk-erlangen.de</a> )                                                                                                                                                                                                                                                                                                                                                                                                                 |
| Contact for scientific queries            | PD Dr. Anna Pendergrass ( <a href="mailto:anna.pendergrass@uk-erlangen.de">anna.pendergrass@uk-erlangen.de</a> );<br>Johanna Schmidt ( <a href="mailto:Schmidt.johanna@uk-erlangen.de">Schmidt.johanna@uk-erlangen.de</a> )                                                                                                                                                                                                                                                                                                                                                                                                                 |
| Public title                              | Motivational Interviewing training for caregiver counsellors                                                                                                                                                                                                                                                                                                                                                                                                                                                                                                                                                                                |
| Scientific title                          | Motivational Interviewing training for caregiver counsellors: Study protocol of an evaluation using the Kirkpatrick Model                                                                                                                                                                                                                                                                                                                                                                                                                                                                                                                   |
| Countries of recruitment                  | Germany                                                                                                                                                                                                                                                                                                                                                                                                                                                                                                                                                                                                                                     |
| Health condition(s) or problem(s) studied | n.a.                                                                                                                                                                                                                                                                                                                                                                                                                                                                                                                                                                                                                                        |
| Intervention(s)                           | Participants attend the training course "MI for informal caregiver counselling", consisting of an info-session (2 units (1 unit = 45 min)), an e-learning course (8 units) and two days of attendance (14 units). After the training course, there will be the possibility to participate in a 6-week post-support (via e-mail and a one-time Zoom session). In addition, participants complete a questionnaire before the start of the training (t0), directly at the end of the training (t1), at the end of the post-support (t2) and 6 months after the training (t6). Four training courses are planned, each with 12-15 participants. |
| Key inclusion and exclusion criteria      | Ages eligible for study: 18+; Sexes eligible for study: all<br>Inclusion criteria:<br>1. Successfully completed training as informal caregiver counsellor<br>2. Currently (at the time of the training) working in the informal caregiver counselling context<br>3. Participation of at least 80% of the training (equivalent to 20 units) "MI for informal caregiver counselling" in 2024<br>4. Given informed consent to participate in the study                                                                                                                                                                                         |
| Study type                                | prospective, interventional, mixed-methods study                                                                                                                                                                                                                                                                                                                                                                                                                                                                                                                                                                                            |
| Date of first enrolment                   | 14/05/2024                                                                                                                                                                                                                                                                                                                                                                                                                                                                                                                                                                                                                                  |
| Target sample size                        | 36                                                                                                                                                                                                                                                                                                                                                                                                                                                                                                                                                                                                                                          |
| Recruitment status                        | ongoing                                                                                                                                                                                                                                                                                                                                                                                                                                                                                                                                                                                                                                     |
| Primary outcome(s)                        | Counselling competence                                                                                                                                                                                                                                                                                                                                                                                                                                                                                                                                                                                                                      |
| Key secondary outcomes                    | 1) Participants' satisfaction with the training<br>2) Participants' knowledge of MI<br>3) Participants' perceived use of MI<br>4) Participants' experience of self-efficacy regarding their counselling sessions<br>5) Participants' level of social cognitions in terms of the Theory of Planned Behaviour regarding the use of MI with future clients                                                                                                                                                                                                                                                                                     |
